# Supplementary material for: Pyridoxal derivative functionalized gold nanoparticles for colorimetric determination of zinc(ii) and aluminium(iii)
Source: Royal Society of Chemistry journal article supplement (doi:10.1039/c5ra20274d), 2015-01-01
Supplement: c5ra20274d1.pdf [file c5ra20274d1.pdf]

## Supporting Information

### Pyridoxal derivative functionalized gold nanoparticles for colorimetric determination of zinc(II) and aluminium(III)

Shilpa Bothra, Rajender Kumar and Suban K Sahoo\*

*Department of Applied Chemistry, SV National Institute of Technology (SVNIT), Surat-395007,  
India.*

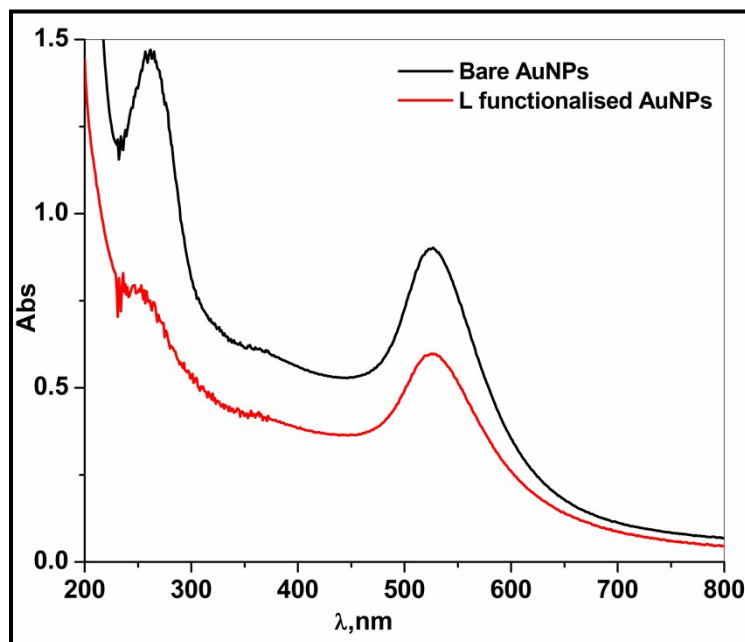

**Fig. 1S.** UV-Vis spectrum of bare and L-AuNPs.

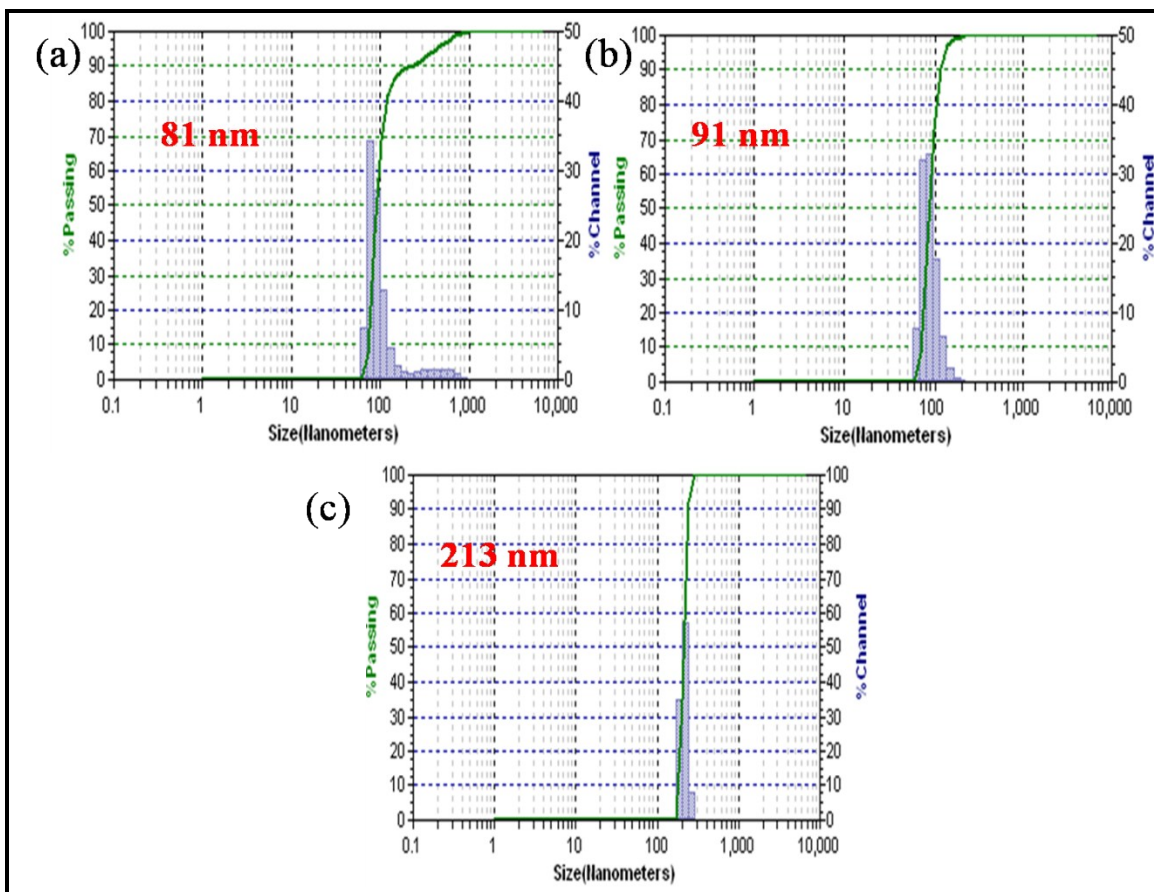

Fig. 2S. DLS spectra of (a) bare AuNPs , (b) L- AuNPs and (c) L- AuNPs in presence of Al<sup>3+</sup>.

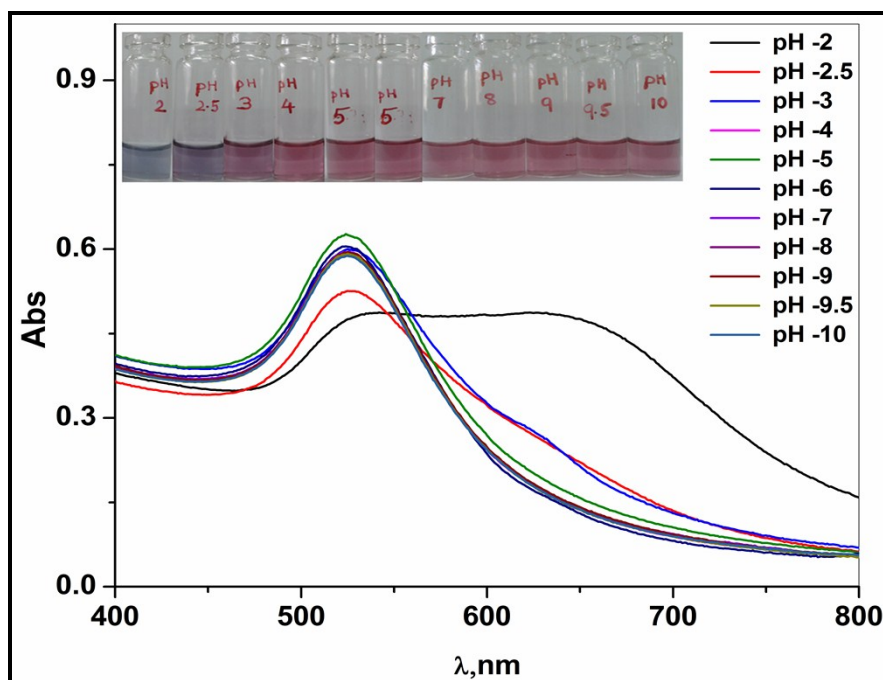

**Fig. 3S.** UV-Vis spectral observations of L-AuNPs at different pH. Inset showing the change in color of nanoparticles from red to blue in acidic medium.

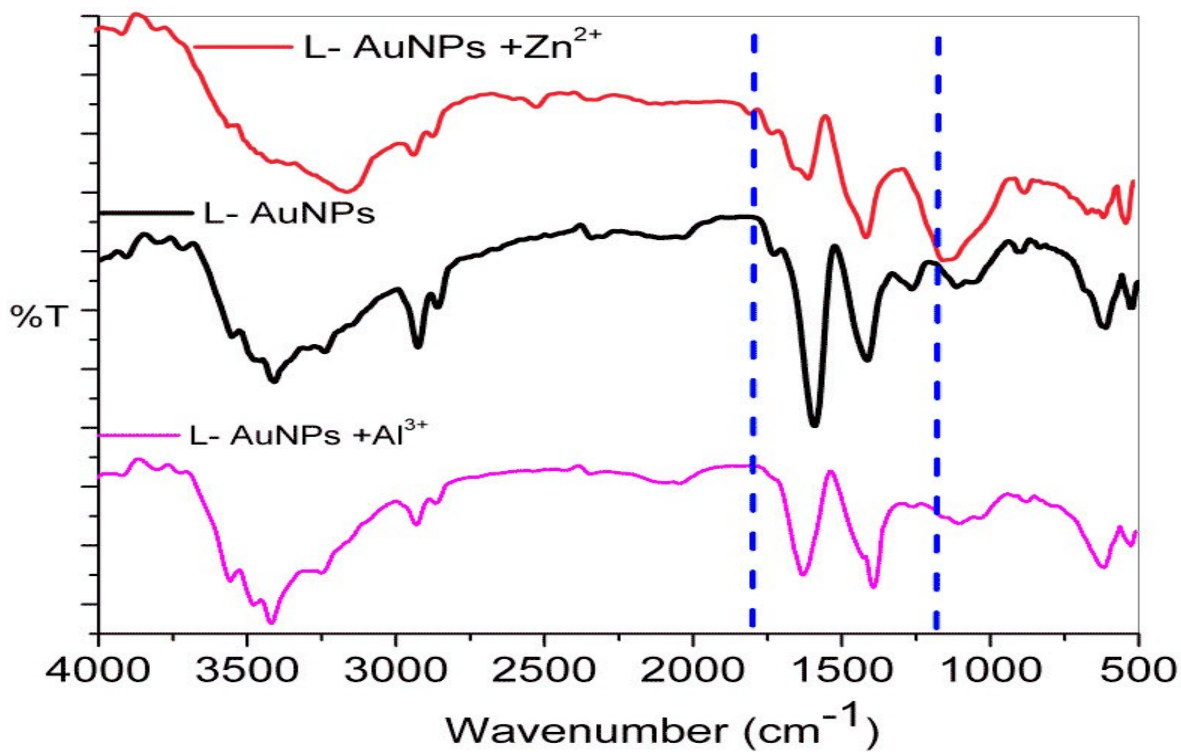

**Fig. 4S.** FT-IR spectra of L-AuNPs alone and in the presence of  $\text{Al}^{3+}$  and  $\text{Zn}^{2+}$ .

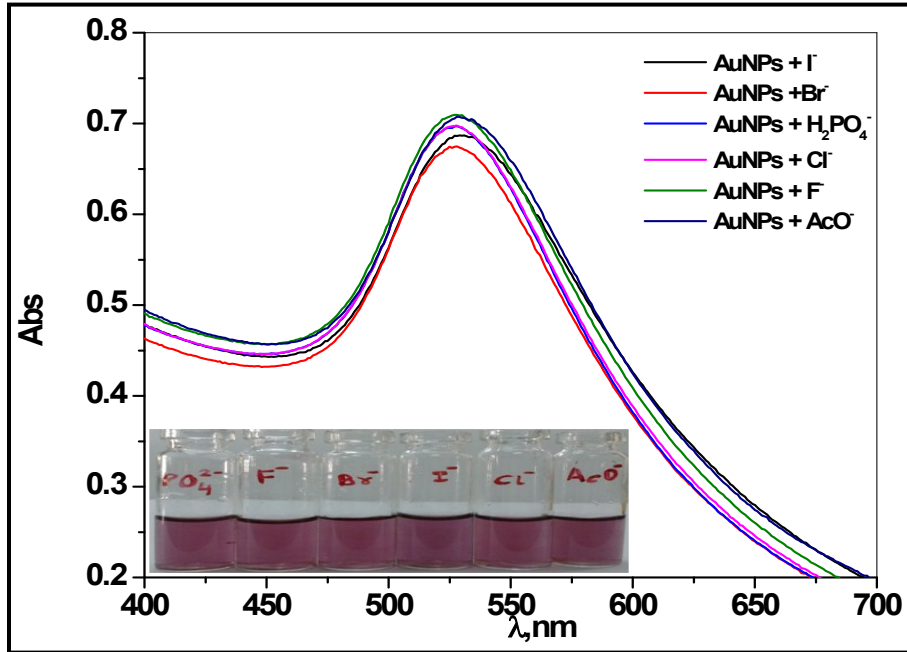

Fig. 5S. Selectivity study of L- AuNPs with different anions ( $5.0 \times 10^{-4}$  M).

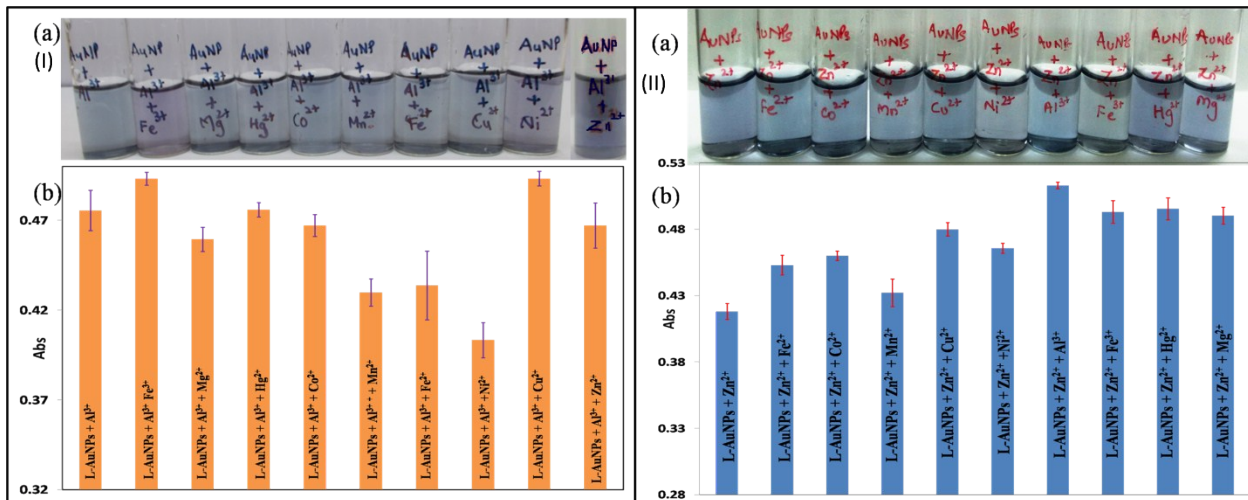

Fig. 6S. Interference experiments of L-AuNPs to detect (I)  $\text{Al}^{3+}$  and (II)  $\text{Zn}^{2+}$  in the presence of different metal ions.

**Table 1S.** Results of the determination of Al<sup>3+</sup> and Zn<sup>2+</sup> in water samples.

| Spiked samples | [Al <sup>3+</sup> /Zn <sup>2+</sup> ] Added (10 <sup>-4</sup> ) M | [Al <sup>3+</sup> /Zn <sup>2+</sup> ] Found (10 <sup>-4</sup> ) M | R%    |
|----------------|-------------------------------------------------------------------|-------------------------------------------------------------------|-------|
| Al1            | 1.32                                                              | 1.57                                                              | 118.9 |
| Al2            | 1.96                                                              | 1.78                                                              | 90.8  |
| Al3            | 2.59                                                              | 1.93                                                              | 74.5  |
| Al4            | 3.23                                                              | 3.35                                                              | 103.7 |
| Zn1            | 1.315                                                             | 1.254                                                             | 95.3  |
| Zn2            | 1.96                                                              | 1.597                                                             | 81.4  |
| Zn3            | 2.59                                                              | 2.34                                                              | 90.3  |
| Zn4            | 3.23                                                              | 3.50                                                              | 108.3 |

**Table 2S.** Comparison of present colorimetric approach using L-AuNPs with the reported methods for detection of Al<sup>3+</sup>.

| NPs                  | Linear range (M) | LOD (M) | Ref. no. (See main text) |
|----------------------|------------------|---------|--------------------------|
| L-AuNPs              | 66.2 to 322 μM   | 0.51 μM | This study               |
| Cit-AuNPs            | -                | 1.0 μM  | [27]                     |
| CALNN-AuNPs          | 0.5 to 6 μM      | 0.2 μM  | [28]                     |
| Mononucleotide-AuNPs | 2.0 to 6 μM      | 0.46 μM | [29]                     |
| Triazole-ether-AuNPs | 0.5 to 5 μM      | 18.0 nM | [30]                     |

**Table 3S.** Comparison of present colorimetric approach using L-AuNPs with the reported methods for detection of Zn<sup>2+</sup>.

| NPs                                  | Linear range (M) | LOD (M) | Ref. no. (See main text) |
|--------------------------------------|------------------|---------|--------------------------|
| L-AuNPs                              | 66.2 to 445 μM   | 0.74 μM | This study               |
| Cht-AuNPs                            | 0-75 μM          | 18 μM   | [31]                     |
| Dithiol surfactants - AuNPs          | -                | -       | [32]                     |
| Polypeptide- AuNPs                   | 1.5–2 mM         | -       | [33]                     |
| Peptide- AuNPs                       | 24 nM–1.2 mM     | 10 nM   | [34]                     |
| bis(pyridine-2-ylmethyl)phenyl-AuNPs | 1.0 to 30.0 μM   | 2 ppm   | [35]                     |
